# Supplementary material for: Graphene quantum dot implanted supramolecular carbon nitrides with robust photocatalytic activity against recalcitrant contaminants
Source: Royal Society of Chemistry journal article supplement (doi:10.1039/d2cy00605g), 2022-01-01

## **Electronic Supplementary Information**

**Graphene quantum dots implanted supramolecular carbon nitrides with robust  
photocatalytic activity against recalcitrant contaminants**

**Table S1** BET surface area ( $S_{\text{BET}}$ ) and pore volume ( $V_{\text{p}}$ ) of BCN, SCN and AGSCN.

| Sample               | $S_{\text{BET}}$ ( $\text{m}^2 \text{g}^{-1}$ ) | $V_{\text{p}}$ ( $\text{cm}^3 \text{g}^{-1}$ ) |
|----------------------|-------------------------------------------------|------------------------------------------------|
| BCN                  | 11                                              | 0.07                                           |
| SCN                  | 39                                              | 0.21                                           |
| AGSCN <sub>0.1</sub> | 60                                              | 0.36                                           |
| AGSCN <sub>0.2</sub> | 75                                              | 0.42                                           |
| AGSCN <sub>0.3</sub> | 93                                              | 0.49                                           |
| AGSCN <sub>0.5</sub> | 87                                              | 0.50                                           |

**Table S2** Carbon and nitrogen bonding compositions of SCN and AGSCN based on XPS analysis<sup>a</sup>.

| Samples              | C 1s (%) |                   |      | N 1s (%) |                    |                  |
|----------------------|----------|-------------------|------|----------|--------------------|------------------|
|                      | N-C=N    | C-NH <sub>x</sub> | C-C  | C-N=C    | N-(C) <sub>3</sub> | -NH <sub>x</sub> |
| SCN                  | 59.6     | 2.5               | 37.9 | 78.4     | 12.9               | 8.7              |
| AGSCN <sub>0.3</sub> | 59.1     | 3.1               | 37.8 | 76.9     | 13.8               | 9.3              |
| AGSCN <sub>0.5</sub> | 55.7     | 6.7               | 37.6 | 74.0     | 15.9               | 10.1             |

<sup>a</sup> The values in table are obtained by calculating the percentage of the peak area of the selected chemical bond to the total peak area of the corresponding element from XPS results.

**Fig. S1** XRD patterns of MCS and MCS/AGQD<sub>0.3</sub>.

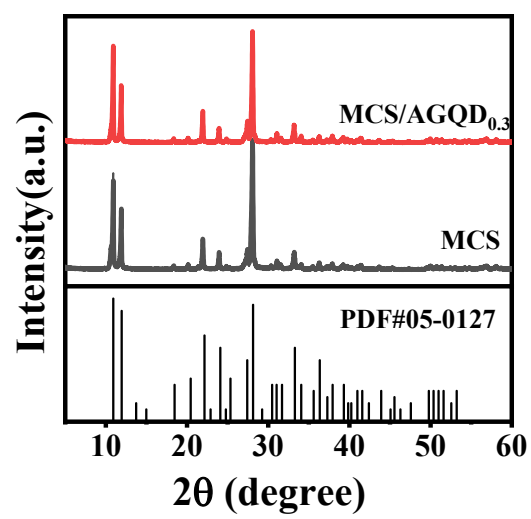

**Fig. S2** FT-IR spectra (a), PL (b) and HRTEM (c) of AGQDs.

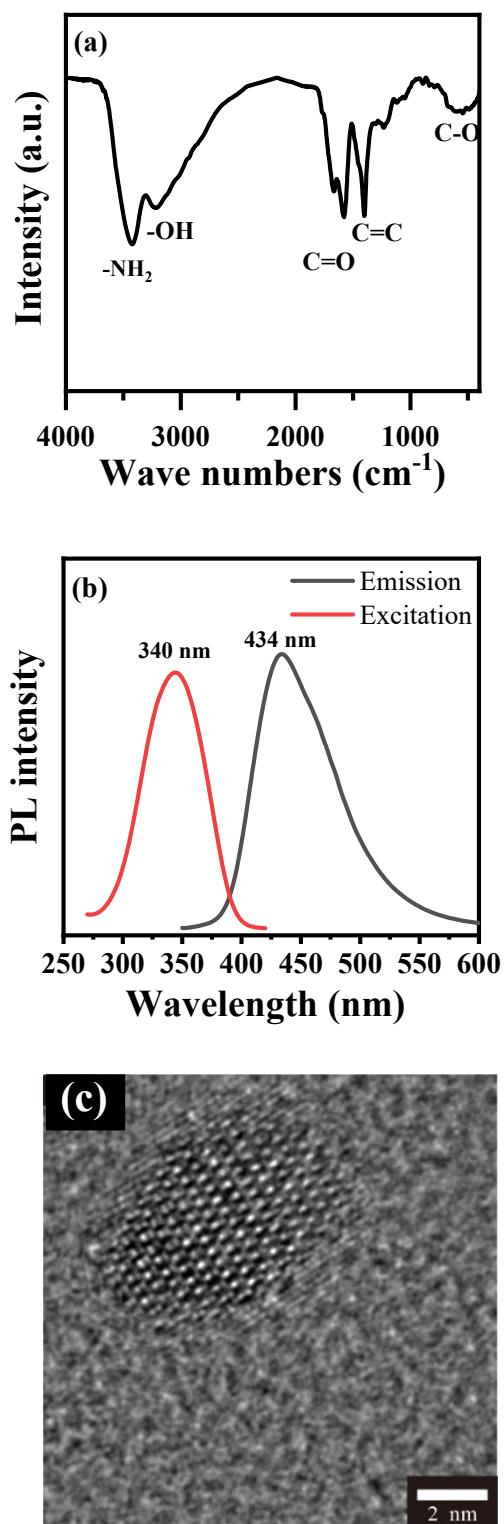

**Fig. S3** TEM image of BCN.

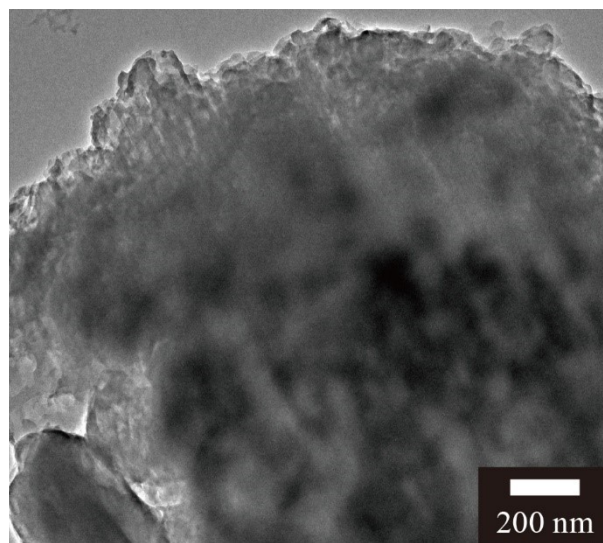

**Fig. S4** Nitrogen gas adsorption/desorption isotherms (a) and BJH pore size distribution curves (b) of BCN, SCN and AGSCN.

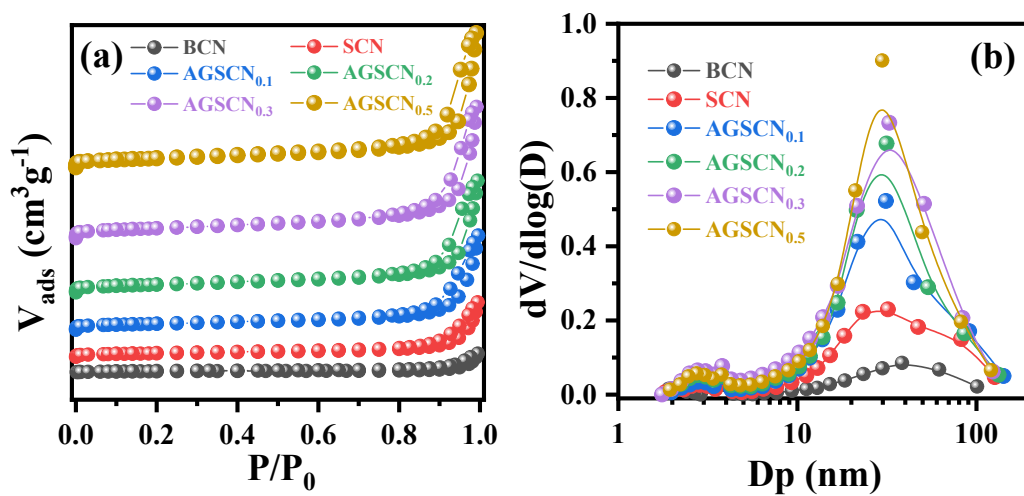

**Fig. S5** LC-MS analysis results of visible-light photocatalytic degradation of ATN over the AGSCN<sub>0.3</sub> for 0 min (a), 10 min (b), 60 min (c) and 240 min (d).

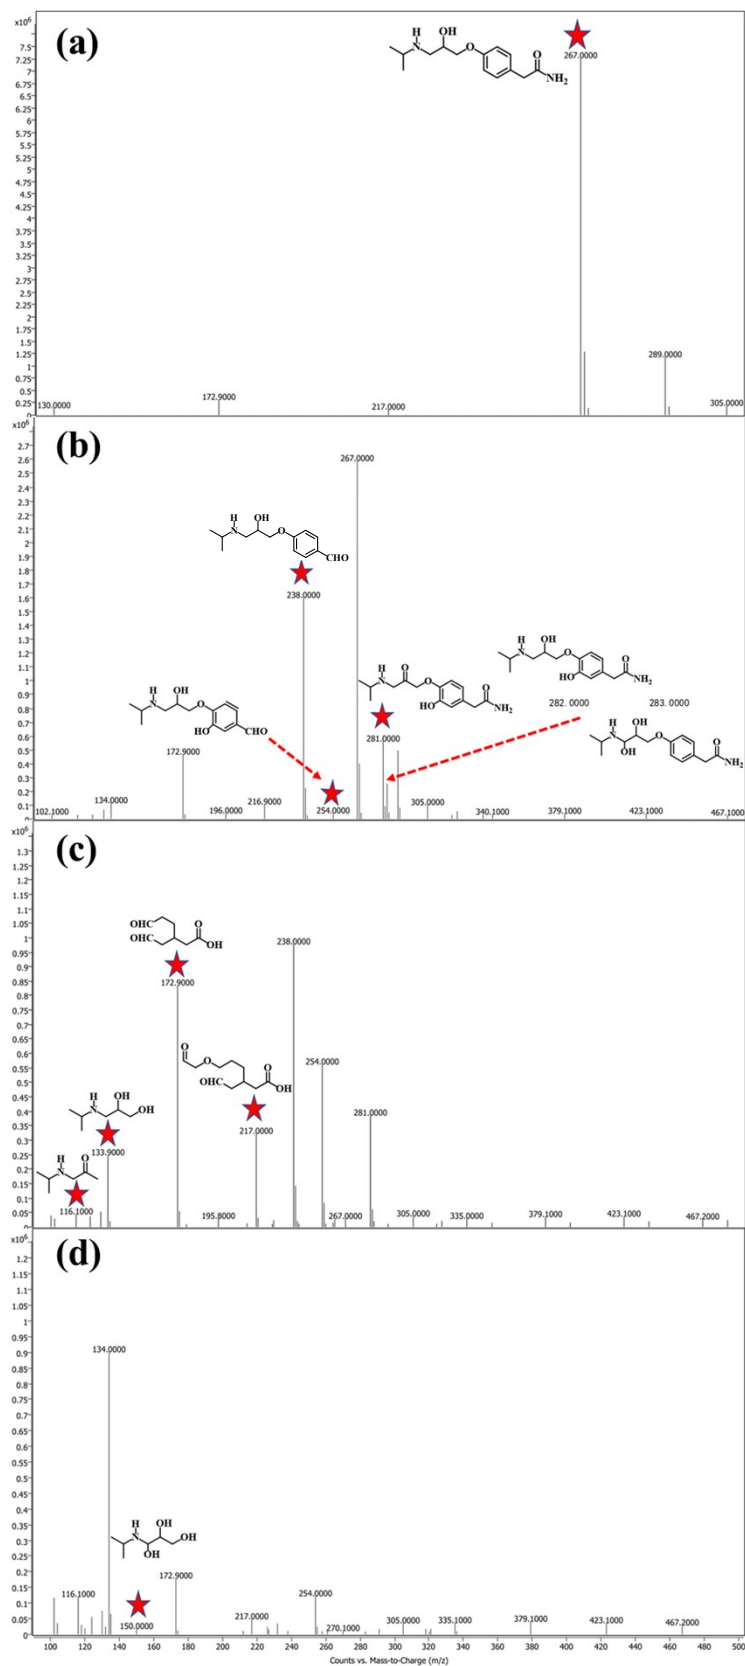



**Fig. S6** Ion chromatographic effluent curve for ATN photocatalytic degradation products over visible-light irradiating AGSCN<sub>0.3</sub>.

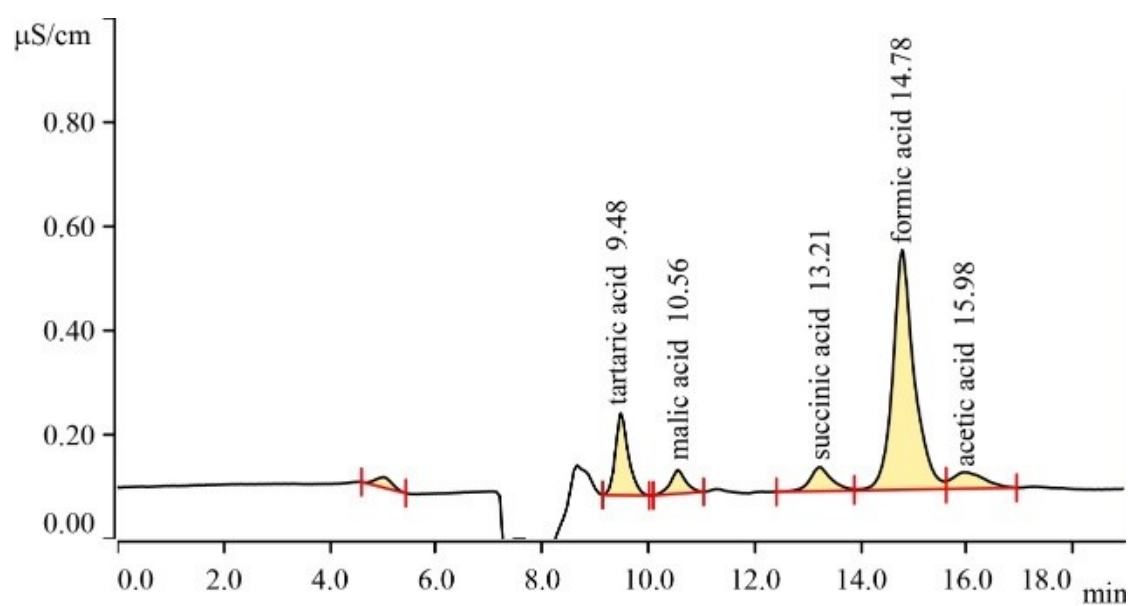

Supplement: d2cy00605g1.pdf [file d2cy00605g1.pdf]
